# Supplementary material
Source: Springer Nature journal article supplement (https://www.springermedizin.de/resource/supplementary/13099_2010_41_MOESM1_ESM.pdf/9665386)
Supplement: MOESM1 [file 9665386]

# % Similarity

# Serotype (n) Total isolates

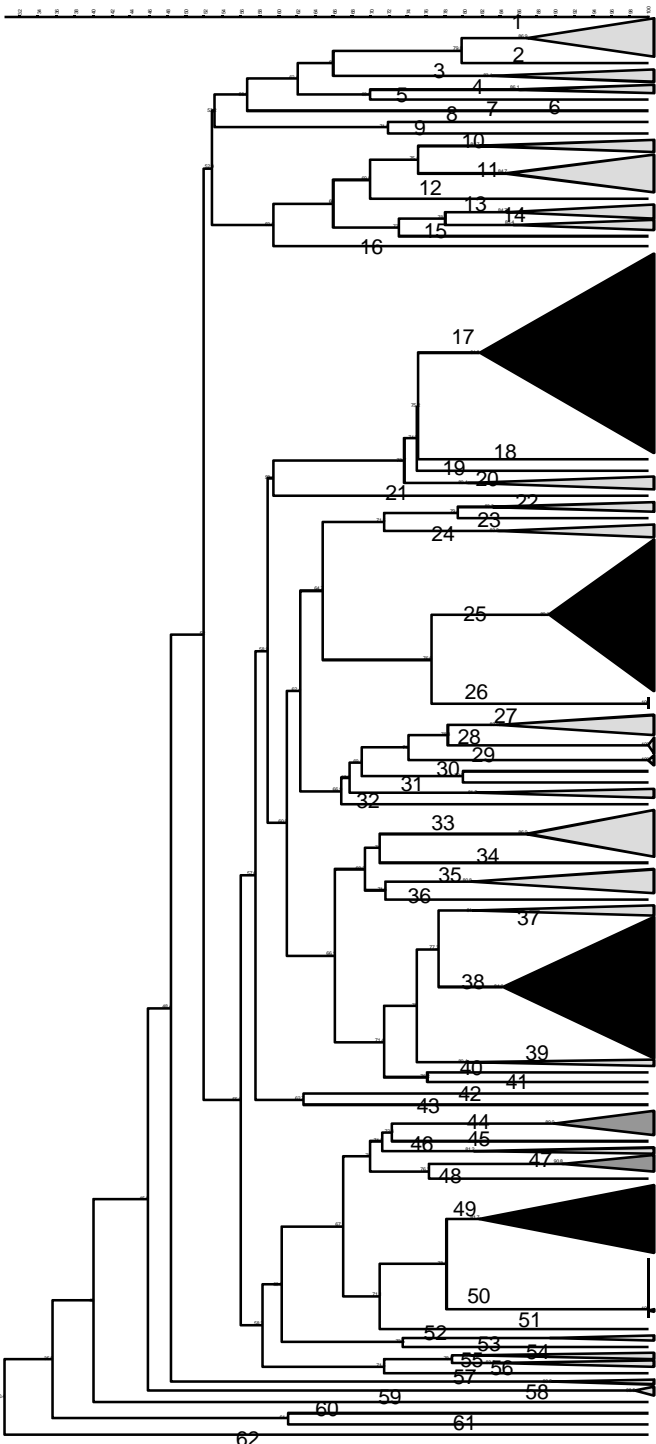

HL: 36(8), HL: Untype(3) 11  
 HL: 36(1) 1  
 HL: 7(1), HL: Untype(3) 4  
 HL: 2(2), HL: Untype(1) 3  
 HL: Untype(1) 1  
 HL: Untype(1) 1  
 HL: Untype(1) 1  
 HL: 36(1) 1  
 HL: 1(2), HL: Untype(2) 4  
 HL: 36(2), HL: 102(1), HL: 1 (8) 10  
 HL: 36(1) 1  
 HL: Untype(4) 4  
 HL: 19(3) 3  
 HL: Untype(1) 1  
 HL: 41(1) 1

HL: 5(23)  
 HL: Untype(14) } 54  
 HL: 36(11)  
 HL: 102(5)  
 HL: 17(1)

HL: Untype(1) 1  
 HL: 1(1) 1  
 HL: 4(3), HL: Untype(1) 4  
 HL: 114(1) 1  
 HL: 36(3) 3  
 HL: 36(1) 1  
 HL: 36(3), HL: Untype(1) 4

HL: 36(38)  
 HL: 7(2) } 43  
 HL: 17(1)  
 HL: Untype(2)

HL: 1(2) 2  
 HL: 4(4), HL: Untype(2) 6  
 HL: 4(5) 5  
 HL: 4(2), HL: 36(1) 3  
 HL: 4(1) 1  
 HL: 36(1) 1  
 HL: 36(1), HL: Untype(2) 3  
 HL: 4(1) 1

HL: 28(12), HL: 11(1) 13

HL: Untype(1) 1  
 HL: 7(4), HL: 36(3) 7  
 HL: 7(1) 1

HL: 11(3) 3  
 HL: 11(37) } 39  
 HL: Untype(2)

HL: 11(2) 2  
 HL: Untype(1) 1  
 HL: 36(1) 1  
 HL: Untype(1) 1  
 HL: 36(1) 1

HL: 19 (7) 7  
 HL: Untype(1) 1  
 HL: 36(1), HL: Untype(1) 2  
 HL: 7(4), HL: 2(1) 8  
 HL: 4(1) 1

HL: 114(10)  
 HL: 9(3), HL: 1(3) } 19  
 HL: Untype (2)  
 HL: 36(1)

HL: 19(7) 7  
 HL: 114(1) 1  
 HL: 2(1), HL: Untype (1) 2  
 HL: 7(1) 1  
 HL: 9(1), HL: Untype(1) 2  
 HL: 2(1), HL: Untype(1) 1  
 HL: Untype(1) 1  
 HL: 8(1), HL: Untype(1) 7  
 HL: 53(1), HL: Untype(2) 3  
 HL: 17(1) 1  
 HL: Untype(1) 1  
 HL: 7(1) 1  
 HL: Untype(1) 1
